# Supplementary material for: Regulation of Aqp1 expression by osmotic balance in fenestrated endothelial cells of the posterior lobe of the pituitary
Source: Research Square preprint supplement (doi:10.21203/rs.3.rs-6677059/v1), 2025-06-02
Supplement: Supplementary file 1 [file f59099c25aa3766d8279c2e3.docx]

Supplemental table 2. Primary antibodies using by immunohistochemistry (IHC) and immunocytochemistry (ICC).

| Primary antibody | Vender | Product number | Dilution |
| --- | --- | --- | --- |
| Guinea pig anti-PLVAP | Home made | N/A | 1:5,000 for IHC  1:2,000 for ICC |
| Rabbit anti-PLVAP | Home made | N/A | 1:80,000 |
| Guinea pig anti-AVP | Home made | N/A | 1:500 |
| Rabbit anti-NG2 | Merck, Darmstadt, Germany | AB5320 | 1:500 |
| Rabbit anti-Laminin | Sigma-Aldrich, MO, USA | L9393 | 1:200 |
| Rabbit anti-AQP1 | Proteintech, IL, USA | 20333-1-AP | 1:5,000 for IHC  1:1,000 for ICC |
| Goat anti-PECAM1 | R&D systems, MN, USA | AF3628 | 1:500 |
