# Supplementary material for: Regulation of Aqp1 expression by osmotic balance in fenestrated endothelial cells of the posterior lobe of the pituitary
Source: Research Square preprint supplement (doi:10.21203/rs.3.rs-6677059/v1), 2025-06-02
Supplement: Supplementary file 2 [file f8b4042c4c0f1a5764a3193d.docx]

Supplemental table 1. Primer sequences for qPCR with SYBR green.

| Gene | Primer sequence (5’-3’) | Product size | Accession number |
| --- | --- | --- | --- |
| *Aqp0* | TGGAGGGCCATATTTGCTGA | 198 bp | NM_001105719.2 |
| GAAGGCAAAAGTGACCGCAG |
| *Aqp1* | GCCTTGTCTGGGGCAGTAAT | 145 bp | NM_012778.2 |
| GGACAACTAGCAGGTGGGTC |
| *Aqp2* | GTGCTGTGCATCTTTGCCTC | 169 bp | NM_012909.3 |
| ACTTGCCAGTGACAACTGCT |
| *Aqp3* | TGGACCTCGCCTTTTCACTG | 114 bp | NM_031703.2 |
| ACACCACCAATGGAACCCAG |
| *Aqp4* | TGGACAGCTGTAAGTGTGGAC | 118 bp | NM_001142366.2 |
| ATGAGCATGGCCAGGAACTC |
| *Aqp5* | AGGGATAGATGGCTCACGGA | 100 bp | NM_012779.2 |
| GTTTATTGGGAAGCGCCCAG |
| *Aqp6* | GATTGGCCATCCTTGTGGGT | 114 bp | NM_022181.2 |
| GAGGCTGTTACACGCTCACT |
| *Aqp7* | GTTTGCGTTCTTGGGGTGTC | 125 bp | NM_019157.3 |
| TTCCCGGCACTGAACACTTT |
| *Aqp8* | AACATCAGCGGTGGACACTT | 173 bp | NM_019158.2 |
| CCAGACGCATTCCAGAACCT |
| *Aqp9* | CCGGATAGCGAAGGAGACAC | 191 bp | NM_022960.2 |
| TGATGTGGCCCCCAGAGATA |
| *Aqp10* | TAGAGTCGGGTGGATGGAGG | 161 bp | XM_039103779.2 |
| GGCCAGTACGGTCAGCATAG |
| *Aqp11* | GGTTTGGGCACCTTTCAAAC | 111 bp | NM_173105.1 |
| ATACAGGCTGCCTCATTTTCACA |
| *Aqp12a* | TGGCCAGTCTGAATGTGTCC | 171 bp | NM_001109009.1 |
| CCAGCACTCGCATCTCTAGG |
| *Pecam1* | AACGGAAGGCTCCCTTGATG | 101 bp | NM_031591.1 |
| TGCAATACAGGAGTCGGCTG |
| *Plvap* | TCTTCGTGTCGCTCATCCAG | 130 bp | NM_020086.1 |
| TGGCTGTATAGGTTGTCGGC |
| *Hprt1* | GTTCTGTCATGTCGACCCTC | 160 bp | NM_012583.2 |
| CGAGCAAGTCTTTCAGTCCT |
